# Supplementary material for: Susceptibility of Ocular Staphylococcus aureus to Antibiotics and Multipurpose Disinfecting Solutions
Source: MDPI journal article supplement (doi:10.3390/antibiotics10101203), 2021-10-03
Supplement: s1 [file s1]

Table S1. MIC and MBC of *S. aureus* strains from different ocular conditions to antibiotics.

| Ocular condition        | Strains | Ciprofloxacin<br>≤1, 2, ≥ 4* µg/ml |      | Ceftazidime<br>≤8, 16, ≥ 32 µg/ml |     | Oxacillin<br>≤ 2, ≥ 4 µg/ml |     | Gentamicin<br>≤4, 8, ≥16 µg/ml |         | Vancomycin<br>≤2, 4-8, ≥16 µg/ml |     | Chloramphenicol<br>≤8, 16, ≥ 32 µg/ml |     | Azithromycin<br>≤2, 4 ≥ 8 µg/ml |      | Polymyxin B<br>≤2, 4, ≥ 8 |     |
|-------------------------|---------|------------------------------------|------|-----------------------------------|-----|-----------------------------|-----|--------------------------------|---------|----------------------------------|-----|---------------------------------------|-----|---------------------------------|------|---------------------------|-----|
|                         |         | MIC                                | MBC  | MIC                               | MBC | MIC                         | MBC | MBC                            | MB<br>C | MIC                              | MBC | MIC                                   | MBC | MIC                             | MBC  | MIC                       | MBC |
| Microbial keratitis USA | 106     | 128 (R)                            | 256  | 128 (R)                           | 256 | 8 (R)                       | 16  | 1 (S)                          | 2       | 0.5 (S)                          | 1   | 8 (S)                                 | 16  | 16 (R)                          | 32   | 40 (R)                    | 16  |
|                         | 107     | 64 (R)                             | 128  | 64 (R)                            | 128 | 128 (R)                     | 256 | 0.5 (S)                        | 1       | 0.5 (S)                          | 1   | 16 (S)                                | 32  | 16 (R)                          | 32   | 160 (R)                   | 32  |
|                         | 108     | 1 (S)                              | 2    | 64 (R)                            | 128 | 32 (R)                      | 32  | 1 (S)                          | 2       | 0.5 (S)                          | 1   | 8 (S)                                 | 16  | 8 (R)                           | 16   | 4 (R)                     | 8   |
|                         | 109     | 128(R)                             | 256  | 128 (R)                           | 256 | 128 (R)                     | 256 | 1 (S)                          | 2       | 0.5 (S)                          | 1   | 8 (S)                                 | 16  | 16 (R)                          | 32   | 4 (I)                     | 8   |
|                         | 110     | 128(R)                             | 256  | 64 (R)                            | 128 | 128 (R)                     | 256 | 0.5 (S)                        | 1       | 0.5 (S)                          | 1   | 8 (S)                                 | 16  | 128(R)                          | 256  | 80 (R)                    | 16  |
|                         | 111     | 1280 (R)                           | 2560 | 32 (R)                            | 64  | 128 (R)                     | 256 | 8 (I)                          | 16      | 2 (S)                            | 2   | 32 (R)                                | 64  | 128 (R)                         | 256  | 80 (R)                    | 16  |
|                         | 112     | 2560 (R)                           | 5120 | 32 (R)                            | 64  | 128 (R)                     | 256 | 2 (S)                          | 4       | 1 (S)                            | 2   | 32 (R)                                | 64  | 128 (R)                         | 256  | 320 (R)                   | 640 |
|                         | 113     | 1280 (R)                           | 2560 | 32 (R)                            | 64  | 32 (R)                      | 64  | 1 (S)                          | 2       | 1 (S)                            | 1   | 32 (R)                                | 64  | 320(R)                          | 1280 | 4 (I)                     | 8   |
|                         | 114     | 8 (R)                              | 16   | 16 (I)                            | 32  | 0.5 (S)                     | 1   | 4 (S)                          | 8       | 0.5 (S)                          | 1   | 32 (R)                                | 64  | 640 (R)                         | 1280 | 8 (R)                     | 16  |
| Microbial keratitis AUS | 34      | 1 (S)                              | 2    | 64 (R)                            | 64  | 1 (S)                       | 1   | 1 (S)                          | 2       | 1 (S)                            | 1   | 8 (S)                                 | 16  | 16 (R)                          | 32   | 128 (R)                   | 256 |
|                         | 129     | 1 (S)                              | 1    | 16 (I)                            | 32  | 0.5 (S)                     | 1   | 0.5 (S)                        | 1       | 2 (S)                            | 2   | 32 (R)                                | 64  | 32 (R)                          | 64   | 40 (R)                    | 16  |
|                         | M5-01   | 64 (R)                             | 128  | 128 (R)                           | 256 | 2 (S)                       | 4   | 2 (S)                          | 2       | 1 (S)                            | 2   | 128 (R)                               | 256 | 8 (R)                           | 16   | 128 (R)                   | 256 |
|                         | M19-01  | 1 (S)                              | 2    | 128(R)                            | 256 | 0.5 (S)                     | 1   | 2 (S)                          | 2       | 1 (S)                            | 2   | 2 (S)                                 | 4   | 16 (R)                          | 32   | 128 (R)                   | 256 |
|                         | M27-01  | 1 (S)                              | 2    | 128 (R)                           | 256 | 0.5 (S)                     | 1   | 2 (S)                          | 4       | 1 (S)                            | 2   | 128(R)                                | 256 | 128(R)                          | 256  | 128 (R)                   | 256 |
|                         | M28-01  | 1 (S)                              | 2    | 320 (R)                           | 640 | 0.5 (S)                     | 1   | 0.5 (S)                        | 1       | 1 (S)                            | 2   | 16 (I)                                | 32  | 320 (R)                         | 640  | 128 (R)                   | 256 |
|                         | M 30-01 | 1 (S)                              | 4    | 128(R)                            | 256 | 1 (S)                       | 2   | 1 (S)                          | 2       | 1 (S)                            | 2   | 64 (R)                                | 128 | 8 (R)                           | 16   | 128(R)                    | 256 |
|                         | M36-01  | 2 (I)                              | 4    | 128(R)                            | 256 | 2 (S)                       | 2   | 2 (S)                          | 2       | 1 (S)                            | 2   | 64 (R)                                | 128 | 128 (R)                         | 256  | 128 (R)                   | 256 |
|                         | M43-01  | 128 (R)                            | 256  | 128 (R)                           | 256 | 4 (R)                       | 8   | 2 (S)                          | 4       | 1 (S)                            | 2   | 16 (I)                                | 32  | 8 (R)                           | 16   | 64 (R)                    | 256 |
|                         | M49-02  | 2 (I)                              | 8    | 128 (R)                           | 256 | 2 (S)                       | 4   | 4 (S)                          | 4       | 1 (S)                            | 2   | 128 (R)                               | 256 | 16 (R)                          | 32   | 128 (R)                   | 128 |
|                         | M65-02  | 1 (S)                              | 4    | 128 (R)                           | 256 | 0.5 (S)                     | 1   | 4 (S)                          | 4       | 1 (S)                            | 2   | 64 (R)                                | 64  | 8 (R)                           | 16   | 128 (R)                   | 256 |
|                         | M71-01  | 4 (R)                              | 16   | 128 (R)                           | 256 | 1 (S)                       | 1   | 1 (S)                          | 2       | 1 (S)                            | 2   | 128 (R)                               | 256 | 128 (R)                         | 256  | 128 (R)                   | 256 |
|                         | M90-01  | 2 (I)                              | 4    | 64 (R)                            | 128 | 0.5 (S)                     | 1   | 1 (S)                          | 2       | 1 (S)                            | 2   | 128 (R)                               | 256 | 128 (R)                         | 256  | 128 (R)                   | 256 |
|                         | M91-01  | 1 (S)                              | 2    | 128 (R)                           | 256 | 1 (S)                       | 2   | 2 (S)                          | 4       | 2 (S)                            | 2   | 128(R)                                | 256 | 16 (R)                          | 16   | 128 (R)                   | 256 |
|                         | 84      | 16 (R)                             | 32   | 64 (R)                            | 128 | 8 (R)                       | 16  | 1 (S)                          | 1       | 0.5 (S)                          | 1   | 8 (S)                                 | 16  | 32 (R)                          | 32   | 8 (R)                     | 256 |
|                         | 85      | 2 (I)                              | 4    | 128(R)                            | 256 | 1 (S)                       | 2   | 0.5 (S)                        | 0.5     | 0.5 (S)                          | 1   | 2 (S)                                 | 8   | 4 (I)                           | 8    | 4 (I)                     | 64  |
|                         | 86      | 1 (S)                              | 2    | 128 (R)                           | 256 | 0.5 (S)                     | 1   | 0.25(S)                        | 0.5     | 0.5 (S)                          | 1   | 32 (R)                                | 64  | 128 (R)                         | 256  | 2 (S)                     | 16  |

|                       |     |          |     |         |     |          |     |          |     |          |     |         |    |        |     |         |     |
|-----------------------|-----|----------|-----|---------|-----|----------|-----|----------|-----|----------|-----|---------|----|--------|-----|---------|-----|
| Conjunctivitis<br>USA | 87  | 2 (I)    | 4   | 128 (R) | 256 | 0.5 (S)  | 1   | 0.5 (S)  | 1   | 0.5 (S)  | 1   | 2 (S)   | 4  | 4 (I)  | 16  | 2 (S)   | 4   |
|                       | 88  | 8 (R)    | 16  | 128 (R) | 256 | 1 (S)    | 2   | 0.25(S)  | 1   | 0.5 (S)  | 1   | 2 (S)   | 4  | 2 (S)  | 4   | 2 (S)   | 4   |
|                       | 89  | 1 (S)    | 2   | 128 (R) | 256 | 0.5 (S)  | 1   | 0.5 (S)  | 1   | 1 (S)    | 2   | 2 (S)   | 8  | 8 (R)  | 16  | 8 (R)   | 32  |
|                       | 90  | 64 (R)   | 128 | 128 (R) | 256 | 0.5 (S)  | 1   | 0.5 (S)  | 1   | 1 (S)    | 1   | 0.5 (S) | 1  | 16 (R) | 32  | 4 (I)   | 16  |
|                       | 91  | 1 (S)    | 2   | 128 (R) | 256 | 0.5 (S)  | 1   | 0.25 (S) | 0.5 | 0.5 (S)  | 1   | 1 (S)   | 2  | 4 (I)  | 16  | 8 (R)   | 16  |
|                       | 92  | 1 (S)    | 2   | 4 (S)   | 16  | 0.5 (S)  | 1   | 0.5 (S)  | 1   | 0.5 (S)  | 1   | 2 (S)   | 4  | 64 (R) | 128 | 4 (I)   | 16  |
|                       | 93  | 4 (R)    | 16  | 128 (R) | 256 | 1 (S)    | 2   | 0.25 (S) | 0.5 | 0.5 (S)  | 1   | 2 (S)   | 4  | 2 (S)  | 4   | 4 (I)   | 16  |
|                       | 94  | 8 (R)    | 16  | 128 (R) | 256 | 2 (S)    | 2   | 1 (S)    | 1   | 0.5 (S)  | 1   | 0.5 (S) | 1  | 4 (I)  | 4   | 4 (I)   | 16  |
|                       | 95  | 16 (R)   | 32  | 64 (R)  | 32  | 0.5 (S)  | 1   | 0.25 (S) | 0.5 | 0.5 (S)  | 1   | 1 (S)   | 2  | 32 (R) | 64  | 4 (I)   | 16  |
|                       | 96  | 1 (S)    | 2   | 128 (R) | 256 | 1 (S)    | 2   | 0.25 (S) | 1   | 0.5 (S)  | 1   | 2 (S)   | 4  | 4 (I)  | 16  | 4 (I)   | 16  |
|                       | 97  | 0.25 (S) | 0.5 | 0.5 (S) | 1   | 0.5 (S)  | 1   | 0.25 (S) | 0.5 | 0.5 (S)  | 1   | 0.5 (S) | 1  | 2 (S)  | 8   | 4 (I)   | 16  |
|                       | 98  | 0.25 (S) | 0.5 | 128 (R) | 256 | 1 (S)    | 2   | 0.25 (S) | 0.5 | 0.5 (S)  | 0.5 | 2 (S)   | 4  | 1 (S)  | 4   | 4 (I)   | 16  |
|                       | 99  | 4 (R)    | 8   | 128 (R) | 256 | 0.5 (S)  | 1   | 0.25 (S) | 0.5 | 0.5 (S)  | 1   | 2 (S)   | 4  | 4 (I)  | 16  | 0.5 (S) | 1   |
|                       | 100 | 0.25 (S) | 1   | 128 (R) | 256 | 0.5 (S)  | 1   | 0.25 (S) | 0.5 | 0.5 (S)  | 1   | 1 (S)   | 2  | 4 (I)  | 16  | 8 (R)   | 16  |
|                       | 101 | 128 (R)  | 256 | 128 (R) | 256 | 64 (R)   | 128 | 0.25 (S) | 0.5 | 0.5 (S)  | 1   | 2 (S)   | 2  | 64 (R) | 128 | 4 (I)   | 8   |
|                       | 102 | 32 (R)   | 64  | 32 (R)  | 64  | 32 (R)   | 64  | 2 (S)    | 2   | 0.5 (S)  | 1   | 1 (S)   | 2  | 4 (I)  | 8   | 4 (I)   | 16  |
|                       | 103 | 32 (R)   | 64  | 128 (R) | 256 | 8 (R)    | 16  | 0.25 (S) | 1   | 0.5 (S)  | 0.5 | 4 (S)   | 8  | 32 (R) | 64  | 4 (I)   | 8   |
|                       | 104 | 128(R)   | 256 | 64 (R)  | 128 | 128 (R)  | 256 | 0.5 (S)  | 1   | 0.5 (S)  | 1   | 0.5 (S) | 1  | 64 (R) | 128 | 4 (I)   | 8   |
|                       | 105 | 128 (R)  | 256 | 32 (R)  | 64  | 32 (R)   | 64  | 1 (S)    | 1   | 1 (S)    | 1   | 0.5 (S) | 1  | 64 (R) | 128 | 32 (R)  | 64  |
| Conjunctivitis<br>AUS | 46  | 1 (S)    | 1   | 4 (S)   | 8   | 1 (S)    | 1   | 0.5 (S)  | 1   | 1 (S)    | 1   | 8 (S)   | 8  | 4 (I)  | 8   | 4 (I)   | 8   |
|                       | 136 | 4 (R)    | 16  | 16 (R)  | 32  | 2 (S)    | 2   | 1 (S)    | 1   | 0.25 (S) | 1   | 16 (I)  | 32 | 8 (R)  | 32  | 16 (R)  | 64  |
|                       | 134 | 1 (S)    | 2   | 32 (R)  | 64  | 0.5 (S)  | 1   | 0.5 (S)  | 1   | 0.5 (S)  | 0.5 | 4 (S)   | 4  | 8 (R)  | 16  | 64 (R)  | 128 |
|                       | 140 | 1 (S)    | 2   | 64 (R)  | 128 | 0.5 (S)  | 1   | 0.5 (S)  | 1   | 0.5 (S)  | 1   | 8 (S)   | 16 | 16 (R) | 32  | 128 (R) | 16  |
| Non-infectious<br>CIE | 12  | 4 (R)    | 16  | 64 (R)  | 128 | 1 (S)    | 2   | 2 (S)    | 2   | 1 (S)    | 1   | 8 (S)   | 16 | 16 (R) | 32  | 4 (I)   | 8   |
|                       | 20  | 1 (S)    | 2   | 32 (R)  | 64  | 1 (S)    | 1   | 1 (S)    | 2   | 0.5 (S)  | 1   | 32 (R)  | 64 | 16 (R) | 32  | 16 (R)  | 8   |
|                       | 24  | 0.25 (S) | 1   | 64 (R)  | 64  | 0.25 (S) | 1   | 1 (S)    | 1   | 0.25 (S) | 1   | 2 (S)   | 8  | 4 (I)  | 16  | 64 (R)  | 64  |
|                       | 25  | 1 (S)    | 2   | 8 (S)   | 32  | 0.5 (S)  | 2   | 1 (S)    | 2   | 1 (S)    | 1   | 8 (S)   | 16 | 8 (R)  | 32  | 32 (R)  | 256 |
|                       | 27  | 1 (S)    | 2   | 64 (R)  | 128 | 8 (R)    | 16  | 1 (S)    | 2   | 1 (S)    | 2   | 2 (S)   | 8  | 8 (R)  | 16  | 64 (R)  | 16  |
|                       | 28  | 0.25 (S) | 1   | 4 (S)   | 8   | 0.5 (S)  | 2   | 0.5 (S)  | 1   | 0.5 (S)  | 2   | 2 (S)   | 4  | 8 (R)  | 16  | 4 (I)   | 16  |
|                       | 32  | 1 (S)    | 2   | 2 (S)   | 4   | 0.5 (S)  | 1   | 2 (S)    | 2   | 0.5 (S)  | 1   | 4 (S)   | 8  | 2 (S)  | 4   | 4 (I)   | 16  |
|                       | 33  | 0.5 (S)  | 1   | 2 (S)   | 4   | 0.5 (S)  | 1   | 0.5 (S)  | 1   | 0.5 (S)  | 1   | 2 (S)   | 8  | 4 (I)  | 16  | 2 (S)   | 4   |
|                       | 48  | 1 (S)    | 2   | 16 (R)  | 32  | 1 (S)    | 2   | 0.5 (S)  | 1   | 0.5 (S)  | 1   | 16 (R)  | 32 | 4 (I)  | 16  | 128 (R) | 256 |
|                       | 117 | 8 (R)    | 16  | 32 (R)  | 64  | 2 (S)    | 4   | 0.5 (S)  | 1   | 1 (S)    | 2   | 8 (S)   | 16 | 8 (R)  | 16  | 128 (R) | 256 |

|  |    |         |    |        |     |          |     |         |   |         |     |        |    |        |     |         |     |
|--|----|---------|----|--------|-----|----------|-----|---------|---|---------|-----|--------|----|--------|-----|---------|-----|
|  | 26 | 0.5 (S) | 1  | 64 (R) | 128 | 0.25 (S) | 0.5 | 0.5 (S) | 1 | 0.5 (S) | 0.5 | 2 (S)  | 2  | 64 (R) | 128 | 8 (R)   | 16  |
|  | 29 | 1 (S)   | 2  | 64 (R) | 64  | 0.5 (S)  | 1   | 1 (S)   | 2 | 0.5 (S) | 1   | 4 (S)  | 8  | 16 (R) | 64  | 128 (R) | 256 |
|  | 31 | 4 (R)   | 16 | 16 (R) | 32  | 1 (S)    | 2   | 0.5(S)  | 1 | 0.5 (S) | 1   | 16 (I) | 32 | 8 (R)  | 16  | 128 (R) | 256 |
|  | 41 | 4 (R)   | 8  | 64 (R) | 128 | 1 (S)    | 2   | 1 (S)   | 1 | 1 (S)   | 2   | 2 (S)  | 4  | 64 (R) | 64  | 4 (I)   | 8   |

\*, break points for each antibiotic form CLSI and EUCAST. R= resistant, I = Intermediate, S= susceptible. Conj. = conjunctivitis, MK = microbial keratitis, niCIE = non-infectious corneal infiltrative events. Grey shade indicates resistance.
